# Supplementary material
Source: PubMed Central journal article supplement (PMC4213251)
Supplement: DS_10.1177_0022034514544299.pdf [file DS_10.1177_0022034514544299.pdf]

J.P. Ney<sup>1</sup>, D.N. van der Goes<sup>2</sup>, and D.L. Chi<sup>3\*</sup>

<sup>1</sup>University of Washington, Department of Neurology, Box 359455, Seattle, WA 98195, USA; <sup>2</sup>University of New Mexico, Department of Economics, 1915 Roma Ave. NE 1019, Albuquerque, NM 87131, USA; and <sup>3</sup>University of Washington, Department of Oral Health Sciences, Box 357475, Seattle, WA 98195, USA; \*corresponding author, dchi@uw.edu

*J Dent Res* DOI: 10.1177/0022034514544299

# Economic Modeling of Sealing Primary Molars Using a “Value of Information” Approach

## APPENDIX

**Appendix Table.** Deterministic Tooth-level Markov Model Parameters and Assumptions for Primary Molar Pit-and-Fissure Sealants: Iowa Medicaid Data, 2008 to 2011

| Model Assumption                                                    | Baseline Parameter <sup>a</sup> | Distribution (SD) for Probabilistic |  | Reference                                    |
|---------------------------------------------------------------------|---------------------------------|-------------------------------------|--|----------------------------------------------|
|                                                                     |                                 | Sensitivity Analysis <sup>b</sup>   |  |                                              |
| Monthly transition probabilities                                    |                                 |                                     |  |                                              |
| Natural to sealed tooth                                             | 0.004590                        | beta (0.004590)                     |  | Iowa Medicaid claims data                    |
| Natural to restored tooth                                           | 0.003570                        | beta (0.000357)                     |  | Dye <i>et al.</i> , 2007                     |
| Natural to extracted tooth                                          | 0.000318                        | beta (0.000318)                     |  | Dye <i>et al.</i> 2007; Iowa Medicaid data   |
| Sealed to natural tooth                                             | 0.002940                        | beta (0.000353) <sup>c</sup>        |  | Kühnisch <i>et al.</i> , 2012                |
| Restored to extracted tooth                                         | 0.000318                        | beta (0.000318)                     |  | Dye <i>et al.</i> , 2007; Iowa Medicaid data |
| Costs, 2012 US\$ <sup>d</sup>                                       |                                 |                                     |  |                                              |
| Natural tooth                                                       | \$0.00                          | ...                                 |  | Authors' assumption                          |
| Sealant (CDT D1351)                                                 | \$20.27                         | gamma (\$20.27)                     |  | Iowa Medicaid dental fee schedule            |
| Restoration (average cost of 7 most common CDT codes <sup>e</sup> ) | \$64.93                         | gamma (\$64.93)                     |  | Iowa Medicaid dental fee schedule            |
| Extraction (CDT D7140)                                              | \$50.67                         | gamma (\$50.67)                     |  | Iowa Medicaid dental fee schedule            |
| Adult tooth                                                         | \$0.00                          | ...                                 |  | Authors' assumption                          |
| Discount rate                                                       | 2%                              | ...                                 |  | Krahn and Gafni, 1993                        |

CDT = Current Dental Terminology.

<sup>a</sup>Monthly probability of transitioning from one state to another or one-time cost associated with state.

<sup>b</sup>The beta distribution assumed for transition probabilities (on the basis of 10% SD except where noted) and gamma distribution assumed for cost parameter estimates.

<sup>c</sup>On the basis of 12% SD from empirical estimates. Variations in one-way sensitivity analysis not evenly spaced on both sides of the mean value to account for skewed data in Kühnisch *et al.*, 2012.

<sup>d</sup>Costs were estimated by the October 2012 Iowa Medicaid dental fee schedule.

<sup>e</sup>CDT codes D2140, D2150, D2330, D2930, D2931, D2932, D3220.

## APPENDIX REFERENCES

Dye BA, Tan S, Smith V, Lewis BG, Barker LK, Thornton-Evans G, *et al.* (2007). Trends in oral health status: United States, 1988-1994 and 1999-2004. *Vital Health Stat 11* 248:1-92.

Krahn M, Gafni A (1993). Discounting in the economic evaluation of health care interventions. *Med Care* 31:403-418.

Kühnisch J, Mansmann U, Heinrich-Weltzien R, Hickel R (2012). Longevity of materials for pit and fissure sealing—results from a meta-analysis. *Dent Mater* 28:298-303.
